# Supplementary material for: Treatment decision satisfaction and regret after focal HIFU for localized prostate cancer
Source: PubMed Central journal article supplement (PMC8124049; doi:10.1007/s00345-020-03301-0), 2020-06-12
Supplement: 345_2020_3301_MOESM2_ESM.pdf [file 345_2020_3301_MOESM2_ESM.pdf]

**Title:** Treatment decision satisfaction and regret after focal HIFU for localized prostate cancer

**Journal:** World Journal of Urology

**Authors:** Niklas Westhoff, Ramona Ernst, Karl Friedrich Kowalewski, Laura Schmidt, Thomas Stefan Worst, Maurice-Stephan Michel, Jost von Hardenberg

**Corresponding author:**

Niklas Westhoff, M.D.

Department of Urology and Urosurgery, Medical Faculty Mannheim, Heidelberg University,  
Mannheim, Germany

Theodor-Kutzer-Ufer 1 - 3

68167 Mannheim, Germany

Fon: +49 621 383 8331

Fax: +49 621 383 2184

Email: [niklas.westhoff@medma.uni-heidelberg.de](mailto:niklas.westhoff@medma.uni-heidelberg.de)

## Prostate Cancer-Related Quality of Life Scales

Clark et al., Journal of Clinical Oncology. 2003 Oct 15;21(20):3777-84

| Domain            | Survey Item                                                                                        |
|-------------------|----------------------------------------------------------------------------------------------------|
| Treatment regret  | I wonder if I would have been better off with a different treatment                                |
|                   | I sometimes wonder whether it was really worthwhile being treated at all                           |
|                   | I sometimes feel the treatment I had was the wrong one for me                                      |
|                   | If I had to do over, I would choose some other treatment                                           |
|                   | I sometimes wish I could change my mind about the kind of treatment I chose for my prostate cancer |
| Informed decision | I had all the information I needed when a treatment was chosen for my prostate cancer              |
|                   | My doctors told me the whole story about the effects of treatment                                  |
|                   | I knew the right questions to ask my doctor                                                        |
|                   | I had enough time to make a decision about my treatment                                            |
| Health worry      | My health could take a turn for the worse at any time                                              |
|                   | I sometimes worry about dying before my time                                                       |
|                   | I worry about what my doctor will find next                                                        |
|                   | I worry that changes in my medical condition will not be detected early                            |
|                   | I am uneasy about the present state of my health                                                   |
|                   | I live in fear that my PSA will rise                                                               |
| PSA concern       | I keep close track of my PSA                                                                       |
|                   | Knowing my PSA level is comforting to me                                                           |
| Outlook           | I feel that my cancer has given me a better outlook on life                                        |
|                   | I feel that coping with cancer has made me a stronger person                                       |

### Response Scale for All Items

|            |              |          |             |           |
|------------|--------------|----------|-------------|-----------|
| Not at All | A Little Bit | Somewhat | Quite a Bit | Very Much |
| 1          | 2            | 3        | 4           | 5         |
